# Supplementary material
Source: ML conference proceedings conference paper supplement (https://openaccess.thecvf.com/content/ICCV2023/html/Suris_ViperGPT_Visual_Inference_ICCV_2023_paper.html)
Supplement: Supplementary file 1 [file Suris_ViperGPT_Visual_Inference_ICCV_2023_supplemental.pdf]

## A. Pretrained Models

We specify details about all the pretrained models used, as well as the code-generation large language model:

- **GLIP** [32]. We use the implementation from the official GitHub repository<sup>3</sup>. In our experiments we use the GLIP-L (large) version. In order to adapt to new versions of PyTorch, we had to modify the CUDA implementation of some functions, as the repository relies on old versions of PyTorch. We provide our updated version of GLIP in our code.
- **MiDaS** [45]. We use the implementation from PyTorch hub<sup>4</sup>, and use the “DPT\_Large” version.
- **BLIP-2** [31]. We tried both the implementation from the official repository<sup>5</sup> and the Huggingface one<sup>6</sup>, with little difference between the two, being the former slightly more performant and the latter faster. In both cases, we used the Flan-T5 XXL version.
- **X-VLM** [67]. We used the official implementation<sup>7</sup>, specifically the version finetuned for retrieval on MSCOCO.
- **GPT-3 for ULM\_query**. The GPT-3 model we use for the LLM query function is the text-davinci-003 one. We use the official OpenAI Python API<sup>8</sup>.
- **Codex**. The GPT-3 model we use for code generation is the code-davinci-002 one.

See the code for more detailed implementation details.

## B. API

We provide the full API next, in Listing 1.

```
1 class ImagePatch:
2     """A Python class containing a crop of an image centered around a particular object, as well as relevant information.
3     Attributes
4     -----
5     cropped_image : array_like
6         An array-like of the cropped image taken from the original image.
7     left : int
8         An int describing the position of the left border of the crop's bounding box in the original image.
9     lower : int
10        An int describing the position of the bottom border of the crop's bounding box in the original image.
11    right : int
12        An int describing the position of the right border of the crop's bounding box in the original image.
13    upper : int
14        An int describing the position of the top border of the crop's bounding box in the original image.
15
16    Methods
17    -----
18    find(object_name: str)->List[ImagePatch]
19        Returns a list of new ImagePatch objects containing crops of the image centered around any objects found in the
20        image matching the object_name.
21    exists(object_name: str)->bool
22        Returns True if the object specified by object_name is found in the image, and False otherwise.
23    verify_property(property: str)->bool
24        Returns True if the property is met, and False otherwise.
25    best_text_match(option_list: List[str], prefix: str)->str
26        Returns the string that best matches the image.
27    simple_query(question: str=None)->str
28        Returns the answer to a basic question asked about the image. If no question is provided, returns the answer
29        to "What is this?".
30    compute_depth()->float
31        Returns the median depth of the image crop.
32    crop(left: int, lower: int, right: int, upper: int)->ImagePatch
33        Returns a new ImagePatch object containing a crop of the image at the given coordinates.
34    """
35
36    def __init__(self, image, left: int=None, lower: int=None, right: int=None, upper: int=None):
37        """Initializes an ImagePatch object by cropping the image at the given coordinates and stores the coordinates as attributes.
```

<sup>3</sup><https://github.com/microsoft/GLIP>

<sup>4</sup>[https://pytorch.org/hub/intelisl\\_midass\\_v2/](https://pytorch.org/hub/intelisl_midass_v2/)

<sup>5</sup><https://github.com/salesforce/LAVIS/tree/main/projects/blip2>

<sup>6</sup><https://huggingface.co/Salesforce/blip2-flan-t5-xxl>

<sup>7</sup><https://github.com/zengyan-97/X-VLM>

<sup>8</sup><https://openai.com/blog/openai-api>

```

38     If no coordinates are provided, the image is left unmodified, and the coordinates are set to the dimensions of the image.
39     Parameters
40     -----
41     image : array_like
42         An array-like of the original image.
43     left : int
44         An int describing the position of the left border of the crop's bounding box in the original image.
45     lower : int
46         An int describing the position of the bottom border of the crop's bounding box in the original image.
47     right : int
48         An int describing the position of the right border of the crop's bounding box in the original image.
49     upper : int
50         An int describing the position of the top border of the crop's bounding box in the original image.
51
52     """
53     if left is None and right is None and upper is None and lower is None:
54         self.cropped_image = image
55         self.left = 0
56         self.lower = 0
57         self.right = image.shape[2] # width
58         self.upper = image.shape[1] # height
59     else:
60         self.cropped_image = image[:, lower:upper, left:right]
61         self.left = left
62         self.upper = upper
63         self.right = right
64         self.lower = lower
65
66     self.width = self.cropped_image.shape[2]
67     self.height = self.cropped_image.shape[1]
68
69     self.horizontal_center = (self.left + self.right) / 2
70     self.vertical_center = (self.lower + self.upper) / 2
71
72     def find(self, object_name: str) -> List[ImagePatch]:
73         """Returns a list of ImagePatch objects matching object_name contained in the crop if any are found.
74         Otherwise, returns an empty list.
75         Parameters
76         -----
77         object_name : str
78             the name of the object to be found
79
80         Returns
81         -----
82         List[ImagePatch]
83             a list of ImagePatch objects matching object_name contained in the crop
84
85         Examples
86         -----
87         >>> # return the children
88         >>> def execute_command(image) -> List[ImagePatch]:
89         >>>     image_patch = ImagePatch(image)
90         >>>     children = image_patch.find("child")
91         >>>     return children
92         """
93
94     def exists(self, object_name: str) -> bool:
95         """Returns True if the object specified by object_name is found in the image, and False otherwise.
96         Parameters
97         -----
98         object_name : str
99             A string describing the name of the object to be found in the image.
100
101         Examples
102         -----
103         >>> # Are there both cakes and gummy bears in the photo?
104         >>> def execute_command(image)->str:
105         >>>     image_patch = ImagePatch(image)
106         >>>     is_cake = image_patch.exists("cake")
107         >>>     is_gummy_bear = image_patch.exists("gummy bear")
108         >>>     return bool_to_yesno(is_cake and is_gummy_bear)
109         """
110         return len(self.find(object_name)) > 0
111
112     def verify_property(self, object_name: str, property: str) -> bool:
113         """Returns True if the object possesses the property, and False otherwise.
114         Differs from 'exists' in that it presupposes the existence of the object specified by object_name, instead checking whether the object
115         possesses the property.
116         Parameters

```

```

116 -----
117 object_name : str
118     A string describing the name of the object to be found in the image.
119 property : str
120     A string describing the property to be checked.
121
122 Examples
123 -----
124 >>> # Do the letters have blue color?
125 >>> def execute_command(image) -> str:
126 >>>     image_patch = ImagePatch(image)
127 >>>     letters_patches = image_patch.find("letters")
128 >>>     # Question assumes only one letter patch
129 >>>     if len(letters_patches) == 0:
130 >>>         # If no letters are found, query the image directly
131 >>>         return image_patch.simple_query("Do the letters have blue color?")
132 >>>     return bool_to_ynsno(letters_patches[0].verify_property("letters", "blue"))
133 >>>
134 return verify_property(self.cropped_image, object_name, property)
135
136 def best_text_match(self, option_list: List[str]) -> str:
137     """Returns the string that best matches the image.
138     Parameters
139     -----
140     option_list : str
141         A list with the names of the different options
142     prefix : str
143         A string with the prefixes to append to the options
144
145     Examples
146     -----
147     >>> # Is the cap gold or white?
148     >>> def execute_command(image)->str:
149     >>>     image_patch = ImagePatch(image)
150     >>>     cap_patches = image_patch.find("cap")
151     >>>     # Question assumes one cap patch
152     >>>     if len(cap_patches) == 0:
153     >>>         # If no cap is found, query the image directly
154     >>>         return image_patch.simple_query("Is the cap gold or white?")
155     >>>     return cap_patches[0].best_text_match(["gold", "white"])
156     >>>
157     return best_text_match(self.cropped_image, option_list)
158
159 def simple_query(self, question: str = None) -> str:
160     """Returns the answer to a basic question asked about the image. If no question is provided, returns the answer to "What is this?".
161     Parameters
162     -----
163     question : str
164         A string describing the question to be asked.
165
166     Examples
167     -----
168
169     >>> # Which kind of animal is not eating?
170     >>> def execute_command(image) -> str:
171     >>>     image_patch = ImagePatch(image)
172     >>>     animal_patches = image_patch.find("animal")
173     >>>     for animal_patch in animal_patches:
174     >>>         if not animal_patch.verify_property("animal", "eating"):
175     >>>             return animal_patch.simple_query("What kind of animal is eating?") # crop would include eating so keep it in the query
176     >>>     # If no animal is not eating, query the image directly
177     >>>     return image_patch.simple_query("Which kind of animal is not eating?")
178
179     >>> # What is in front of the horse?
180     >>> # contains a relation (around, next to, on, near, on top of, in front of, behind, etc), so ask directly
181     >>> return image_patch.simple_query("What is in front of the horse?")
182     >>>
183     >>>
184     return simple_qa(self.cropped_image, question)
185
186 def compute_depth(self):
187     """Returns the median depth of the image crop
188     Parameters
189     -----
190     Returns
191     -----
192     float
193         the median depth of the image crop
194

```

```

195     Examples
196     -----
197     >>> # the person furthest away
198     >>> def execute_command(image) -> ImagePatch:
199     >>>     image_patch = ImagePatch(image)
200     >>>     person_patches = image_patch.find("person")
201     >>>     person_patches.sort(key=lambda person: person.compute_depth())
202     >>>     return person_patches[-1]
203     """
204     depth_map = compute_depth(self.cropped_image)
205     return depth_map.median()
206
207 def crop(self, left: int, lower: int, right: int, upper: int) -> ImagePatch:
208     """Returns a new ImagePatch cropped from the current ImagePatch.
209     Parameters
210     -----
211     left : int
212         The leftmost pixel of the cropped image.
213     lower : int
214         The lowest pixel of the cropped image.
215     right : int
216         The rightmost pixel of the cropped image.
217     upper : int
218         The uppermost pixel of the cropped image.
219     -----
220     """
221     return ImagePatch(self.cropped_image, left, lower, right, upper)
222
223 def overlaps_with(self, left, lower, right, upper):
224     """Returns True if a crop with the given coordinates overlaps with this one,
225     else False.
226     Parameters
227     -----
228     left : int
229         the left border of the crop to be checked
230     lower : int
231         the lower border of the crop to be checked
232     right : int
233         the right border of the crop to be checked
234     upper : int
235         the upper border of the crop to be checked
236
237     Returns
238     -----
239     bool
240         True if a crop with the given coordinates overlaps with this one, else False
241
242     Examples
243     -----
244     >>> # black cup on top of the table
245     >>> def execute_command(image) -> ImagePatch:
246     >>>     image_patch = ImagePatch(image)
247     >>>     table_patches = image_patch.find("table")
248     >>>     if len(table_patches) == 0:
249     >>>         table_patches = [image_patch] # If no table found, assume the whole image is a table
250     >>>     table_patch = table_patches[0]
251     >>>     cup_patches = image_patch.find("black cup")
252     >>>     for cup in cup_patches:
253     >>>         if cup.vertical_center > table_patch.vertical_center
254     >>>             return cup
255     >>>     return cup_patches[0] # If no cup found on top of the table, return the first cup found
256     """
257     return self.left <= right and self.right >= left and self.lower <= upper and self.upper >= lower
258
259 def best_image_match(list_patches: List[ImagePatch], content: List[str], return_index=False) -> Union[ImagePatch, int]:
260     """Returns the patch most likely to contain the content.
261     Parameters
262     -----
263     list_patches : List[ImagePatch]
264     content : List[str]
265         the object of interest
266     return_index : bool
267         if True, returns the index of the patch most likely to contain the object
268
269     Returns
270     -----
271     int
272     Patch most likely to contain the object
273

```

```

274
275 Examples
276 -----
277 >>> # Return the man with the hat
278 >>> def execute_command(image):
279     >>> image_patch = ImagePatch(image)
280     >>> man_patches = image_patch.find("man")
281     >>> if len(man_patches) == 0:
282     >>>     return image_patch
283     >>> hat_man = best_image_match(list_patches=man_patches, content=["hat"])
284     >>> return hat_man
285
286 >>> # Return the woman with the pink scarf and blue pants
287 >>> def execute_command(image):
288     >>> image_patch = ImagePatch(image)
289     >>> woman_patches = image_patch.find("woman")
290     >>> if len(woman_patches) == 0:
291     >>>     return image_patch
292     >>> woman_most = best_image_match(list_patches=woman_patches, content=["pink scarf", "blue pants"])
293     >>> return woman_most
294     """
295     return best_image_match(list_patches, content, return_index)
296
297
298 def distance(patch_a: ImagePatch, patch_b: ImagePatch) -> float:
299     """
300     Returns the distance between the edges of two ImagePatches. If the patches overlap, it returns a negative distance
301     corresponding to the negative intersection over union.
302     """
303     return distance(patch_a, patch_b)
304
305
306 def bool_to_yesno(bool_answer: bool) -> str:
307     return "yes" if bool_answer else "no"
308
309
310 def llm_query(question: str) -> str:
311     """Answers a text question using GPT-3. The input question is always a formatted string with a variable in it.
312
313     Parameters
314     -----
315     question: str
316         the text question to ask. Must not contain any reference to 'the image' or 'the photo', etc.
317     """
318     return llm_query(question)
319
320
321 class VideoSegment:
322     """A Python class containing a set of frames represented as ImagePatch objects, as well as relevant information.
323     Attributes
324     -----
325     video : torch.Tensor
326         A tensor of the original video.
327     start : int
328         An int describing the starting frame in this video segment with respect to the original video.
329     end : int
330         An int describing the ending frame in this video segment with respect to the original video.
331     num_frames->int
332         An int containing the number of frames in the video segment.
333
334     Methods
335     -----
336     frame_iterator->Iterator[ImagePatch]
337     trim(start, end)->VideoSegment
338         Returns a new VideoSegment containing a trimmed version of the original video at the [start, end] segment.
339     select_answer(info, question, options)->str
340         Returns the answer to the question given the options and additional information.
341     """
342
343     def __init__(self, video: torch.Tensor, start: int = None, end: int = None, parent_start=0, queues=None):
344         """Initializes a VideoSegment object by trimming the video at the given [start, end] times and stores the
345         start and end times as attributes. If no times are provided, the video is left unmodified, and the times are
346         set to the beginning and end of the video.
347
348     Parameters
349     -----
350     video : torch.Tensor
351         A tensor of the original video.
352     start : int

```

```

353     An int describing the starting frame in this video segment with respect to the original video.
354     end : int
355     An int describing the ending frame in this video segment with respect to the original video.
356     """
357
358     if start is None and end is None:
359         self.trimmed_video = video
360         self.start = 0
361         self.end = video.shape[0] # duration
362     else:
363         self.trimmed_video = video[start:end]
364         if start is None:
365             start = 0
366         if end is None:
367             end = video.shape[0]
368         self.start = start + parent_start
369         self.end = end + parent_start
370
371     self.num_frames = self.trimmed_video.shape[0]
372
373     def frame_iterator(self) -> Iterator[ImagePatch]:
374         """Returns an iterator over the frames in the video segment."""
375         for i in range(self.num_frames):
376             yield ImagePatch(self.trimmed_video[i], self.start + i)
377
378     def trim(self, start: Union[int, None] = None, end: Union[int, None] = None) -> VideoSegment:
379         """Returns a new VideoSegment containing a trimmed version of the original video at the [start, end]
380         segment.
381
382         Parameters
383         -----
384         start : Union[int, None]
385             An int describing the starting frame in this video segment with respect to the original video.
386         end : Union[int, None]
387             An int describing the ending frame in this video segment with respect to the original video.
388
389         Examples
390         -----
391         >>> # Return the second half of the video
392         >>> def execute_command(video):
393         >>>     video_segment = VideoSegment(video)
394         >>>     video_second_half = video_segment.trim(video_segment.num_frames // 2, video_segment.num_frames)
395         >>>     return video_second_half
396         """
397         if start is not None:
398             start = max(start, 0)
399         if end is not None:
400             end = min(end, self.num_frames)
401
402         return VideoSegment(self.trimmed_video, start, end, self.start)
403
404     def select_answer(self, info: dict, question: str, options: List[str]) -> str:
405         return select_answer(self.trimmed_video, info, question, options)
406
407     def __repr__(self):
408         return "VideoSegment({}, {})".format(self.start, self.end)

```

Listing 1. Full API.

Not all methods are used in all the benchmarks. Next we describe in more detail what content is used for the API specifications for every benchmark.

- **RefCOCO and RefCOCO+.** We use all the methods from the ImagePatch class except for `best_text_match` and `simple_query`. We also use the `best_text_match` and `distance` functions. Additionally we add ImagePatch usage examples in the API definition that are representative of the RefCOCO dataset, and look like the following:

```

1 # chair at the front
2 def execute_command(image) -> ImagePatch:
3     # Return the chair
4     image_patch = ImagePatch(image)
5     chair_patches = image_patch.find("chair")
6     chair_patches.sort(key=lambda chair: chair.compute_depth())
7     chair_patch = chair_patches[0]
8     # Remember: return the chair
9     return chair_patch

```

Listing 2. RefCOCO example.

- **GQA.** The GQA API contains all the contents in the API from Listing 1 up until the `llm_query` function, which is not used. The ImagePatch usage examples look like the following:

```

1 # Is there a backpack to the right of the man?
2 def execute_command(image)->str:
3     image_patch = ImagePatch(image)
4     man_patches = image_patch.find("man")
5     # Question assumes one man patch
6     if len(man_patches) == 0:
7         # If no man is found, query the image directly
8         return image_patch.simple_query("Is there a backpack to the right of the man?")
9     man_patch = man_patches[0]
10    backpack_patches = image_patch.find("backpack")
11    # Question assumes one backpack patch
12    if len(backpack_patches) == 0:
13        return "no"
14    for backpack_patch in backpack_patches:
15        if backpack_patch.horizontal_center > man_patch.horizontal_center:
16            return "yes"
17    return "no"

```

Listing 3. GQA example.

- **OK-VQA.** The API only uses the `simple_query` method from ImagePatch. It additionally uses the `llm_query` function. The ImagePatch usage examples look like the following:

```

1
2 # Who is famous for allegedly doing this in a lightning storm?
3 def execute_command(image)->str:
4     # The question is not direct perception, so we need to ask the image for more information
5     # Salient information: what is being done?
6     image = ImagePatch(image)
7     guesses = []
8     action = image.simple_query("What is being done?")
9     external_knowledge_query = "Who is famous for allegedly {} in a lightning storm?".format(action)
10    step_by_step_guess = llm_query(external_knowledge_query)
11    guesses.append("what is being done is {}".format(action) + ", so " + step_by_step_guess)
12    direct_guess = image.simple_query("Who is famous for allegedly doing this in a lightning storm?")
13    guesses.append(direct_guess)
14    return process_guesses("Who is famous for allegedly doing this in a lightning storm?", guesses)

```

Listing 4. OK-VQA example.

- **NeXT-QA.** The VideoSegment class is added to the API definition, and the available ImagePatch methods are `find`, `exists`, `best_text_match` and `simple_query`. The function `best_image_match` is also used. The ImagePatch usage examples look like:

```

1 # why does the man with a red hat put his arm down at the end of the video
2 # possible answers: ['watching television', 'searching for food', 'move its head', 'looking over cardboard box', 'looks at the camera']
3 def execute_command(video, possible_answers, question)->[str, dict]:
4     # Reason every step
5     video_segment = VideoSegment(video)
6     # Caption last frame of the video (end of video)
7     last_frame = ImagePatch(video_segment, -1)
8     last_caption = last_frame.simple_query("What is this?")
9     men = last_frame.find("man")
10    if len(men) == 0:
11        men = [last_frame]
12    man = men[0]
13    man_action = man.simple_query("What is the man doing?")
14    # Answer the question. Remember to create the info dictionary
15    info = {
16        "Caption of last frame": last_caption,
17        "Man looks like he is doing": man_action
18    }
19    answer = video_segment.select_answer(info, question, possible_answers)
20    return answer, info

```

Listing 5. NeXT-QA example.

- **Beyond benchmarks.** For the examples in Figure 1 we use the same API as the one used for the benchmarks, and the usage examples are taken from the benchmark APIs, combining them to have more generality. We do not add any other example, ViperGPT generalizes to the complex cases shown in Figure 1 just based on the provided API.

Note that in some of the examples we added comments, as well as error handling. The generated code also contains similar lines. We removed those for clarity in the figures shown in the main paper.
